# Supplementary material for: Mouse Pachytene Checkpoint 2 (Trip13) Is Required for Completing Meiotic Recombination but Not Synapsis
Source: PLOS journal article supplement (doi:10.1371/journal.pgen.0030130), 2007-08-07
Supplement: S2 (10.1371/journal.pgen.0030130.s002) [file journal.pgen.0030130.s002]

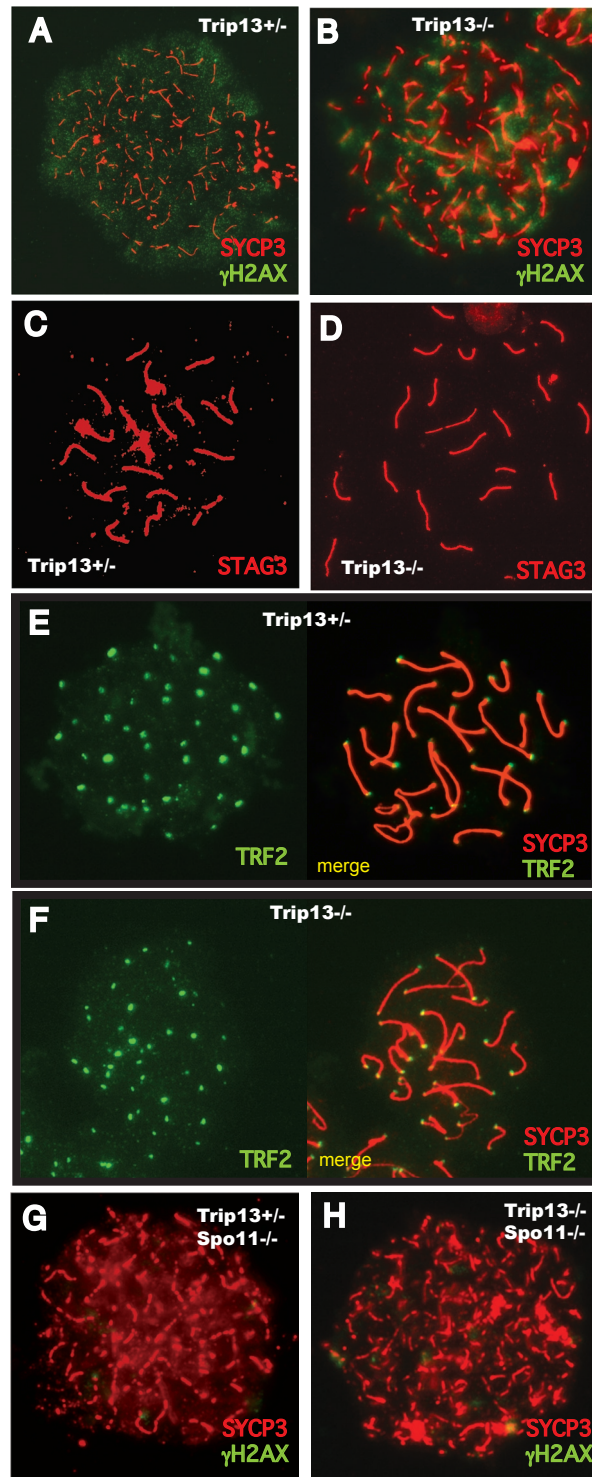

**Figure S2.** Surface-spread chromosomes were immunolabelled with the indicated antibodies and fluors. The nuclei in panels A, B, G and H are in leptotema, and the rest are in pachynema.
